# Supplementary material for: Temporal genetic structure in a poecilogonous polychaete: the interplay of developmental mode and environmental stochasticity
Source: PubMed Central journal article supplement (PMC3905951; doi:10.1186/1471-2148-14-12), 2014-01-22
Supplement: 1471-2148-14-12-S1.pdf [file 1471-2148-14-12-S1.pdf]

## Additional files

### Additional file 1. Pair-wise $F_{ST}$ values for among populations comparisons within years.

Pair-wise  $F_{ST}$  values for among populations comparisons within years. These results are similar to what was reported in Kesäniemi *et al.* 2012b and show strong structure among most populations except for some geographically close populations (as described in the text). Pair-wise comparisons on grey background are discussed in the results.

| <b>2008</b> | FIA      | FIF      | DKV      |          |          |          |    |
|-------------|----------|----------|----------|----------|----------|----------|----|
| FIA         | 0        |          |          |          |          |          |    |
| FIF         | 0.009*   | 0        |          |          |          |          |    |
| DKV         | 0.052*** | 0.043*** | 0        |          |          |          |    |
| DKH         | 0.026*** | 0.026*** | 0.016**  |          |          |          |    |
| <b>2009</b> | FIA      | FIF      | DKR      | DKV      | NET      | UK       |    |
| FIA         | 0        |          |          |          |          |          |    |
| FIF         | 0.010    | 0        |          |          |          |          |    |
| DKR         | 0.046*** | 0.055*** | 0        |          |          |          |    |
| DKV         | 0.048*** | 0.062*** | 0.023*** | 0        |          |          |    |
| NET         | 0.029*** | 0.050*** | 0.027*** | 0.019*** | 0        |          |    |
| UK          | 0.104*** | 0.125*** | 0.071*** | 0.045*** | 0.064*** | 0        |    |
| <b>2010</b> | FIA      | FIF      | DKR      | DKV      | DKR      | NET      | UK |
| FIA         | 0        |          |          |          |          |          |    |
| FIF         | 0.008*   | 0        |          |          |          |          |    |
| DKR         | 0.019*** | 0.023**  | 0        |          |          |          |    |
| DKV         | 0.020*** | 0.025*** | 0.010*   | 0        |          |          |    |
| DKH         | 0.010**  | 0.018*** | 0.009*   | 0.006    | 0        |          |    |
| NET         | 0.018*** | 0.025*** | 0.020*** | 0.016**  | 0.011**  | 0        |    |
| UK          | 0.061*** | 0.074*** | 0.055*** | 0.046*** | 0.041*** | 0.051*** | 0  |

\* $P < 0.05$ , \*\* $P < 0.01$ , \*\*\* $P < 0.001$
