# Supplementary material for: Temporal genetic structure in a poecilogonous polychaete: the interplay of developmental mode and environmental stochasticity
Source: PubMed Central journal article supplement (PMC3905951; doi:10.1186/1471-2148-14-12), 2014-01-22

**Additional file 2. Results of PCA analysis on linearized pair-wise  $F_{ST}$ .**

Results of PCA analysis on linearized pair-wise  $F_{ST}$ . Differences among the temporal samples and populations are visualized.

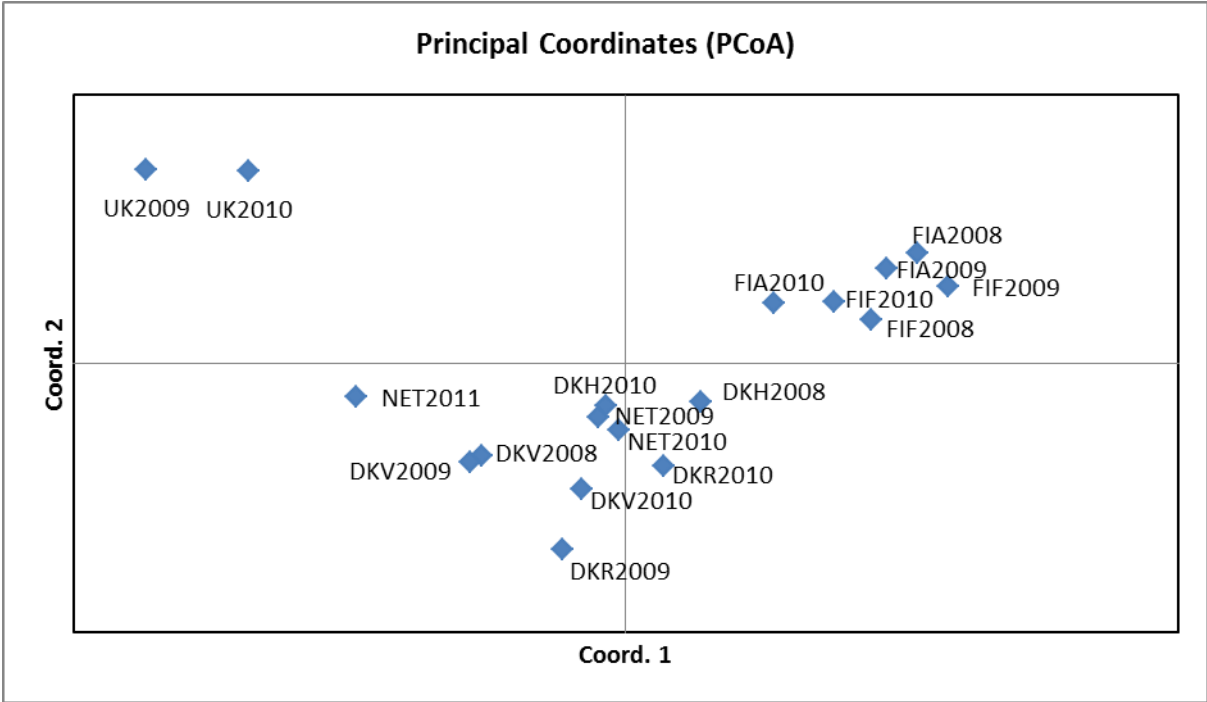

Supplement: 1471-2148-14-12-S2.pdf [file 1471-2148-14-12-S2.pdf]
