# Supplementary material for: Temporal genetic structure in a poecilogonous polychaete: the interplay of developmental mode and environmental stochasticity
Source: PubMed Central journal article supplement (PMC3905951; doi:10.1186/1471-2148-14-12), 2014-01-22
Supplement: 1471-2148-14-12-S3.pdf [file 1471-2148-14-12-S3.pdf]

### Additional file 3. Genetic variation in the temporal samples after the removal of full-sib individuals

Genetic variation in the temporal samples after the removal of full-sib individuals (all samples are included but samples in bold have full-sibs removed). Observed ( $H_O$ ) and expected ( $H_E$ ) heterozygosity, inbreeding coefficient ( $F_{IS}$ , with significant values underlined) are reported.

| Sample         | $H_O$   | $H_E$   | $F_{IS\ OLD}$ | $F_{IS}$ no full-sibs |
|----------------|---------|---------|---------------|-----------------------|
| <b>FIA2008</b> | 0.57896 | 0.65804 | <u>0.116</u>  | <u>0.115</u>          |
| <b>FIA2009</b> | 0.56272 | 0.66314 | <u>0.140</u>  | <u>0.140</u>          |
| FIA2010        | 0.68795 | 0.71434 | 0.015         | 0.015                 |
| FIF2008        | 0.53108 | 0.64313 | <u>0.153</u>  | <u>0.153</u>          |
| FIF2009        | 0.47757 | 0.61436 | <u>0.202</u>  | <u>0.202</u>          |
| FIF2010        | 0.56730 | 0.65473 | <u>0.128</u>  | <u>0.128</u>          |
| <b>DKR2009</b> | 0.59758 | 0.69896 | <u>0.146</u>  | <u>0.126</u>          |
| <b>DKR2010</b> | 0.60993 | 0.68942 | <u>0.092</u>  | 0.089                 |
| <b>DKV2008</b> | 0.65147 | 0.76540 | <u>0.126</u>  | <u>0.114</u>          |
| <b>DKV2009</b> | 0.71428 | 0.77757 | <u>0.076</u>  | 0.067                 |
| <b>DKV2010</b> | 0.69450 | 0.72946 | 0.030         | 0.022                 |
| DKH2008        | 0.59607 | 0.67679 | 0.099         | 0.099                 |
| <b>DKH2010</b> | 0.56731 | 0.72006 | <u>0.189</u>  | <u>0.187</u>          |
| <b>NET2009</b> | 0.58282 | 0.70370 | <u>0.169</u>  | <u>0.173</u>          |
| <b>NET2010</b> | 0.60589 | 0.68921 | <u>0.124</u>  | <u>0.122</u>          |
| NET2011        | 0.61595 | 0.75168 | <u>0.182</u>  | <u>0.182</u>          |
| UK2009         | 0.60609 | 0.79936 | <u>0.242</u>  | <u>0.242</u>          |
| UK2010         | 0.66405 | 0.79743 | <u>0.165</u>  | <u>0.165</u>          |
