# Supplementary material for: Temporal genetic structure in a poecilogonous polychaete: the interplay of developmental mode and environmental stochasticity
Source: PubMed Central journal article supplement (PMC3905951; doi:10.1186/1471-2148-14-12), 2014-01-22
Supplement: 1471-2148-14-12-S4.pdf [file 1471-2148-14-12-S4.pdf]

**Additional file 4. Within population temporal pair-wise  $F_{ST}$  values after the removal of full-sibs individuals.**

Within population temporal pair-wise  $F_{ST}$  values after the removal of full-sibs individuals (bolded temporal samples had full-sibs removed).

| <b>Finland</b>     |             |             |
|--------------------|-------------|-------------|
| FIA                | <b>2008</b> | <b>2009</b> |
| <b>2009</b>        | 0.001       |             |
| 2010               | 0.008**     | 0.004       |
| <b>Denmark</b>     |             |             |
| DKR                | <b>2009</b> |             |
| <b>2010</b>        | 0.003       |             |
| DKH                | 2008        |             |
| <b>2010</b>        | 0.007       |             |
| DKV                | <b>2008</b> | <b>2009</b> |
| <b>2009</b>        | 0.001       |             |
| <b>2010</b>        | 0.003       | 0.003       |
| <b>Netherlands</b> |             |             |
| NET                | <b>2009</b> | <b>2010</b> |
| <b>2010</b>        | 0.001       |             |
| 2011               | 0.037***    | 0.032***    |

\* $P < 0.05$ , \*\* $P < 0.01$ , \*\*\* $P < 0.001$
